# Supplementary material for: Induction of pro-inflammatory genes by serum amyloid A1 in human amnion fibroblasts
Source: PubMed Central journal article supplement (PMC5429602; doi:10.1038/s41598-017-00782-9), 2017-04-06
Supplement: 41598_2017_782_MOESM1_ESM.pdf [file 41598_2017_782_MOESM1_ESM.pdf]

## **Induction of pro-inflammatory genes by serum amyloid A1 in human amnion fibroblasts**

Wenjiao Li<sup>1,2+</sup>, Wangsheng Wang<sup>1,2+</sup>, Rujuan Zuo<sup>1,2</sup>, Chao Liu<sup>1,2</sup>, Qun Shu<sup>3</sup>, Hao Ying<sup>4</sup>, Kang Sun<sup>1,2\*</sup>

<sup>1</sup>Center for Reproductive Medicine, Ren Ji Hospital, School of Medicine, Shanghai Jiao Tong University. Shanghai, P.R. China.

<sup>2</sup>Shanghai Key Laboratory for Assisted Reproduction and Reproductive Genetics, Shanghai, P.R. China.

<sup>3</sup>Department of Obstetrics and Gynecology, Zhongshan Hospital, Fudan University, Shanghai, P.R. China.

<sup>4</sup>Shanghai First Maternity and Infant Hospital, Tongji University School of Medicine, Shanghai, P.R. China

## Supplementary figures and table

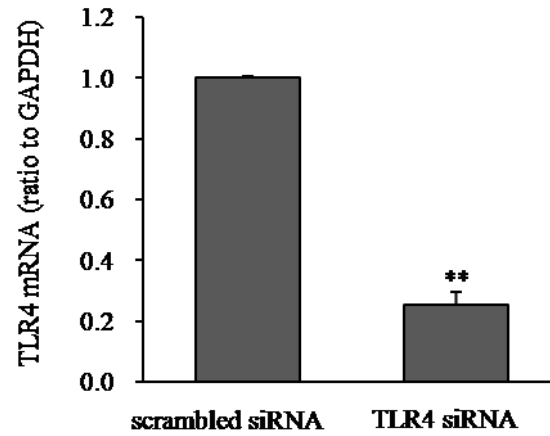

**Supplementary Figure S1** Efficiency of siRNA-mediated knock-down of TLR4 in human amnion fibroblasts. Data are the mean  $\pm$  SEM. n = 4. Statistical analysis was performed with paired Student's t test. \*\*P<0.01 vs scrambled siRNA.

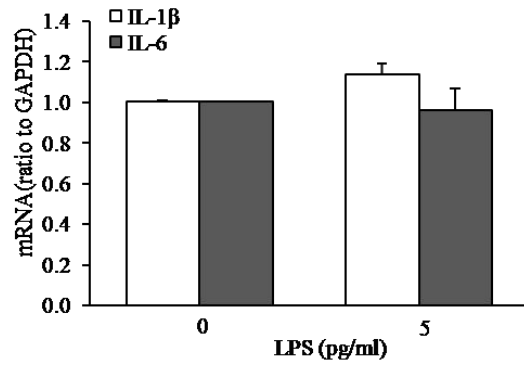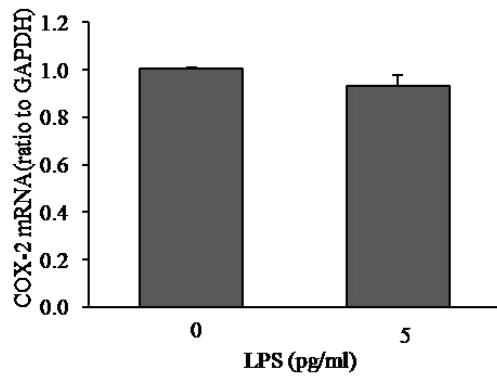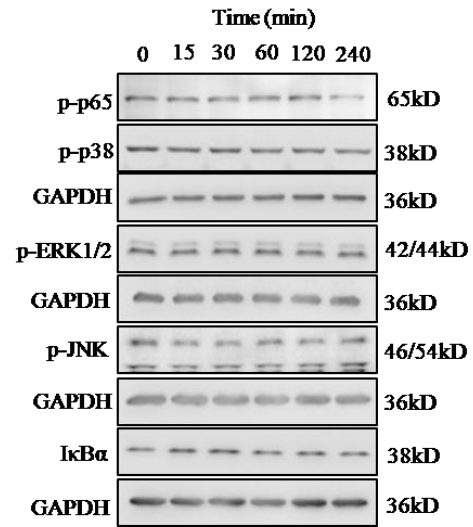

**Supplementary Figure S2 (A and B)** LPS (5  $\mu\text{g/ml}$ , 24 hours) had no effect on the expression of IL-1 $\beta$ , IL-6 and COX-2 in human amnion fibroblasts. Data are the mean  $\pm$  SEM. n=3. **(C)** LPS (5  $\mu\text{g/ml}$ ) had no effect on either the abundance of phosphorylated p65, p38, ERK1/2 and JNK or the abundance of I $\kappa$ B $\alpha$ .

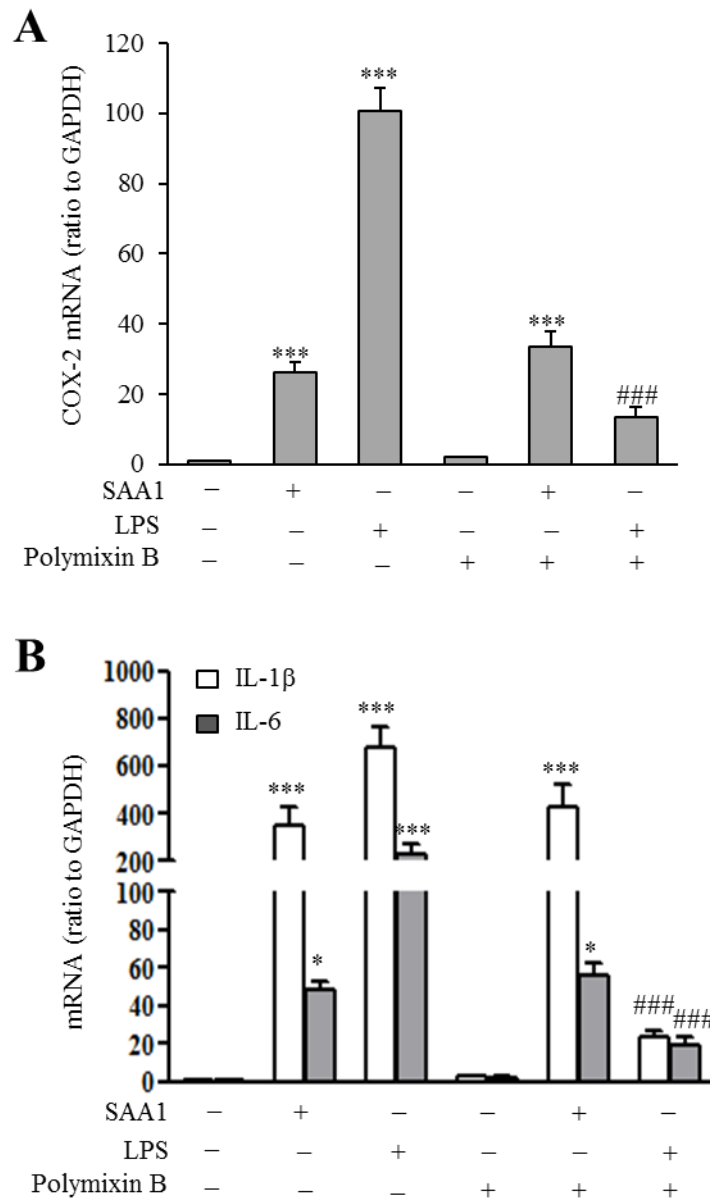

**Supplementary Figure S3 (A and B)** LPS inhibitor Polymixin B (25  $\mu\text{g}/\text{mL}$ , 24 hours) had no effect on SAA1 (10  $\text{ng}/\text{mL}$ )-induced but blocked LPS (5  $\text{ng}/\text{mL}$ )-induced expression of COX-2 (A), IL-1 $\beta$  and IL-6 (B) in human amnion fibroblasts. Data are the mean  $\pm$  SEM.  $n = 3$ . \* $P < 0.05$ , \*\*\* $P < 0.001$  vs control (0); ### $P < 0.001$  vs LPS.

### Supplementary Table S1 Primer sequences used for qRT-PCR

| <b>Genes</b>        | <b>Primers sequence</b>                                                      |
|---------------------|------------------------------------------------------------------------------|
| <i><b>IL1B</b></i>  | Forward: 5'-CCACCTCCAGGGACAGGATA -3'<br>Reverse: 5'-AACACGCAGGACAGGTACAG -3' |
| <i><b>IL6</b></i>   | Forward: 5'-CTTCGGTCCAGTTGCCTTCT -3'<br>Reverse: 5'-GTGCCTCTTTGCTGCTTTCA -3' |
| <i><b>PTGS2</b></i> | Forward: 5'-TGTGCAACACTTGAGTGGCT -3'<br>Reverse: 5'-ACTTTCTGTACTGCGGGTG -3'  |
| <i><b>TLR4</b></i>  | Forward: 5'-AAAATCCCCGACAACCTCCC-3'<br>Reverse: 5'-AGAGGTGGCTTAGGCTCTGA-3'   |
| <i><b>GAPDH</b></i> | Forward: 5'-CCCCTCTGCTGATGCCCCCA-3'<br>Reverse: 5'-TGACCTTGGCCAGGGGTGCT-3'   |
